# Supplementary material
Source: MDPI journal article supplement (https://www.mdpi.com/2073-4441/14/13/2002)
Supplement: s1 [file s1]

# FARRUKHABAD SUBDIVISION

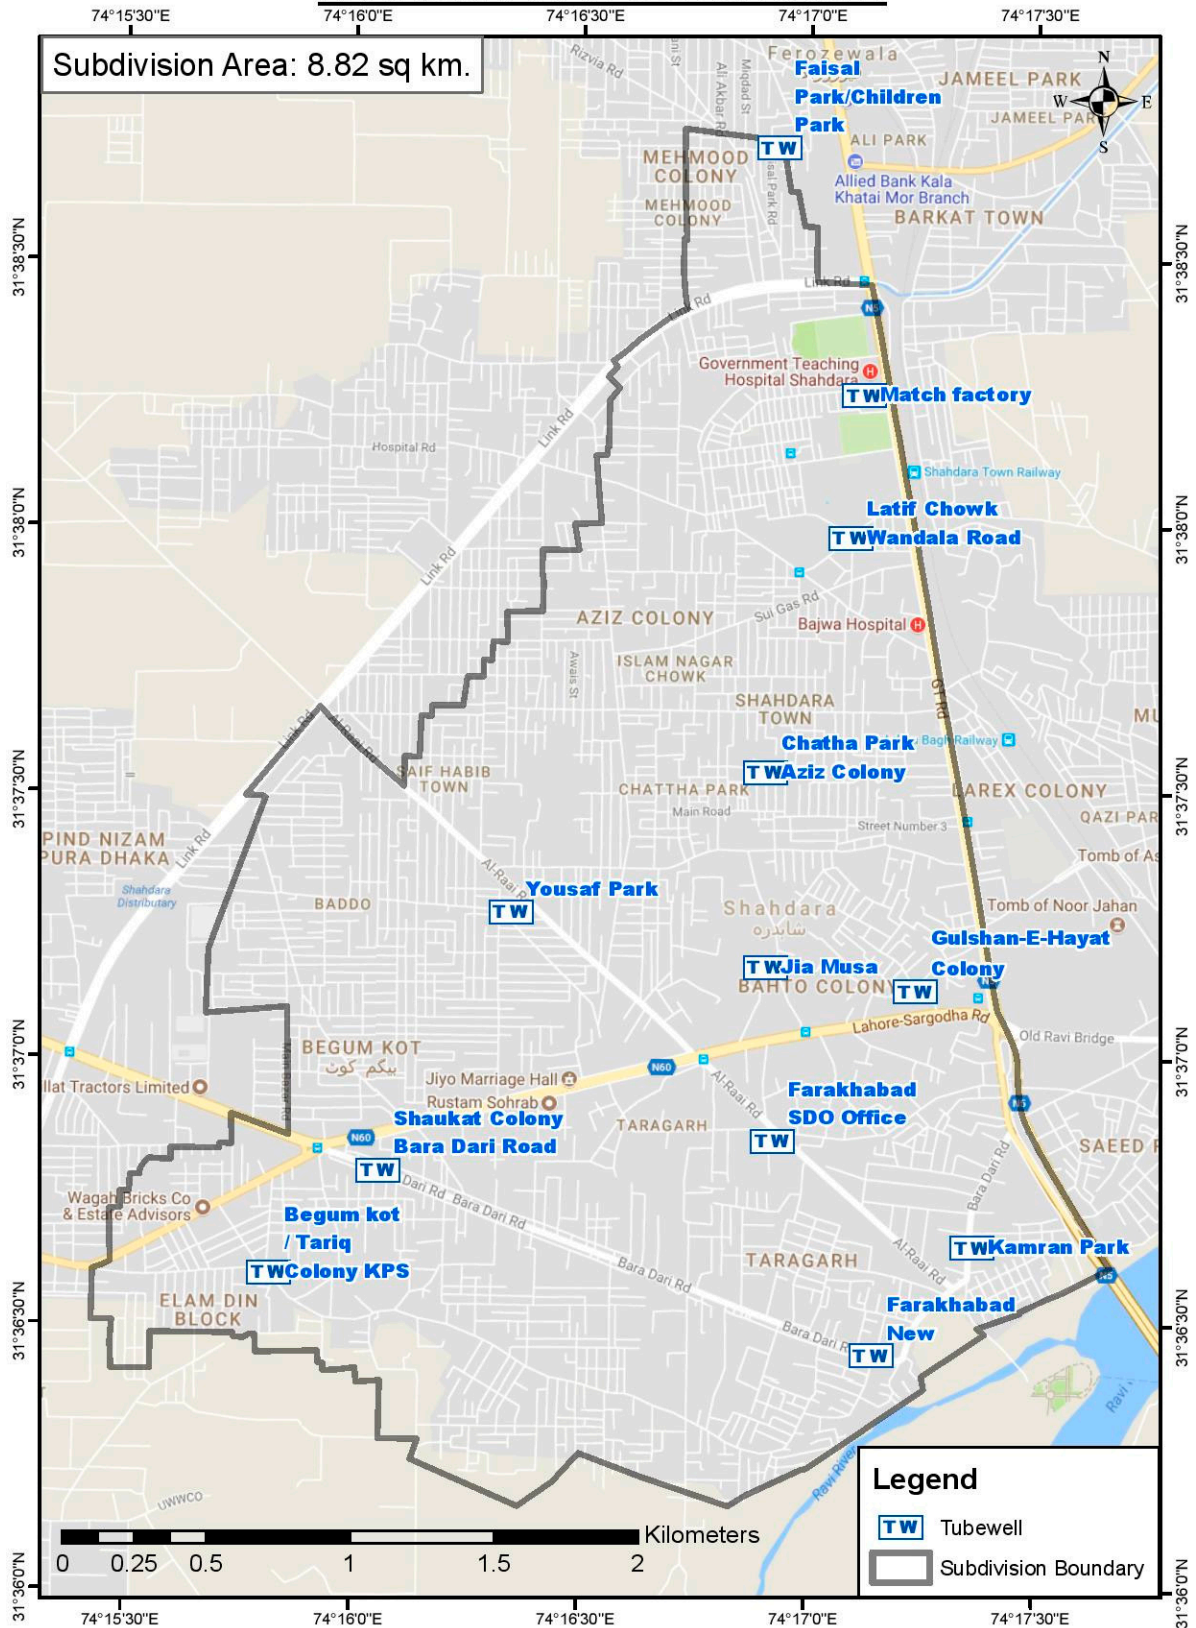

# SHAHDARA SUBDIVISION

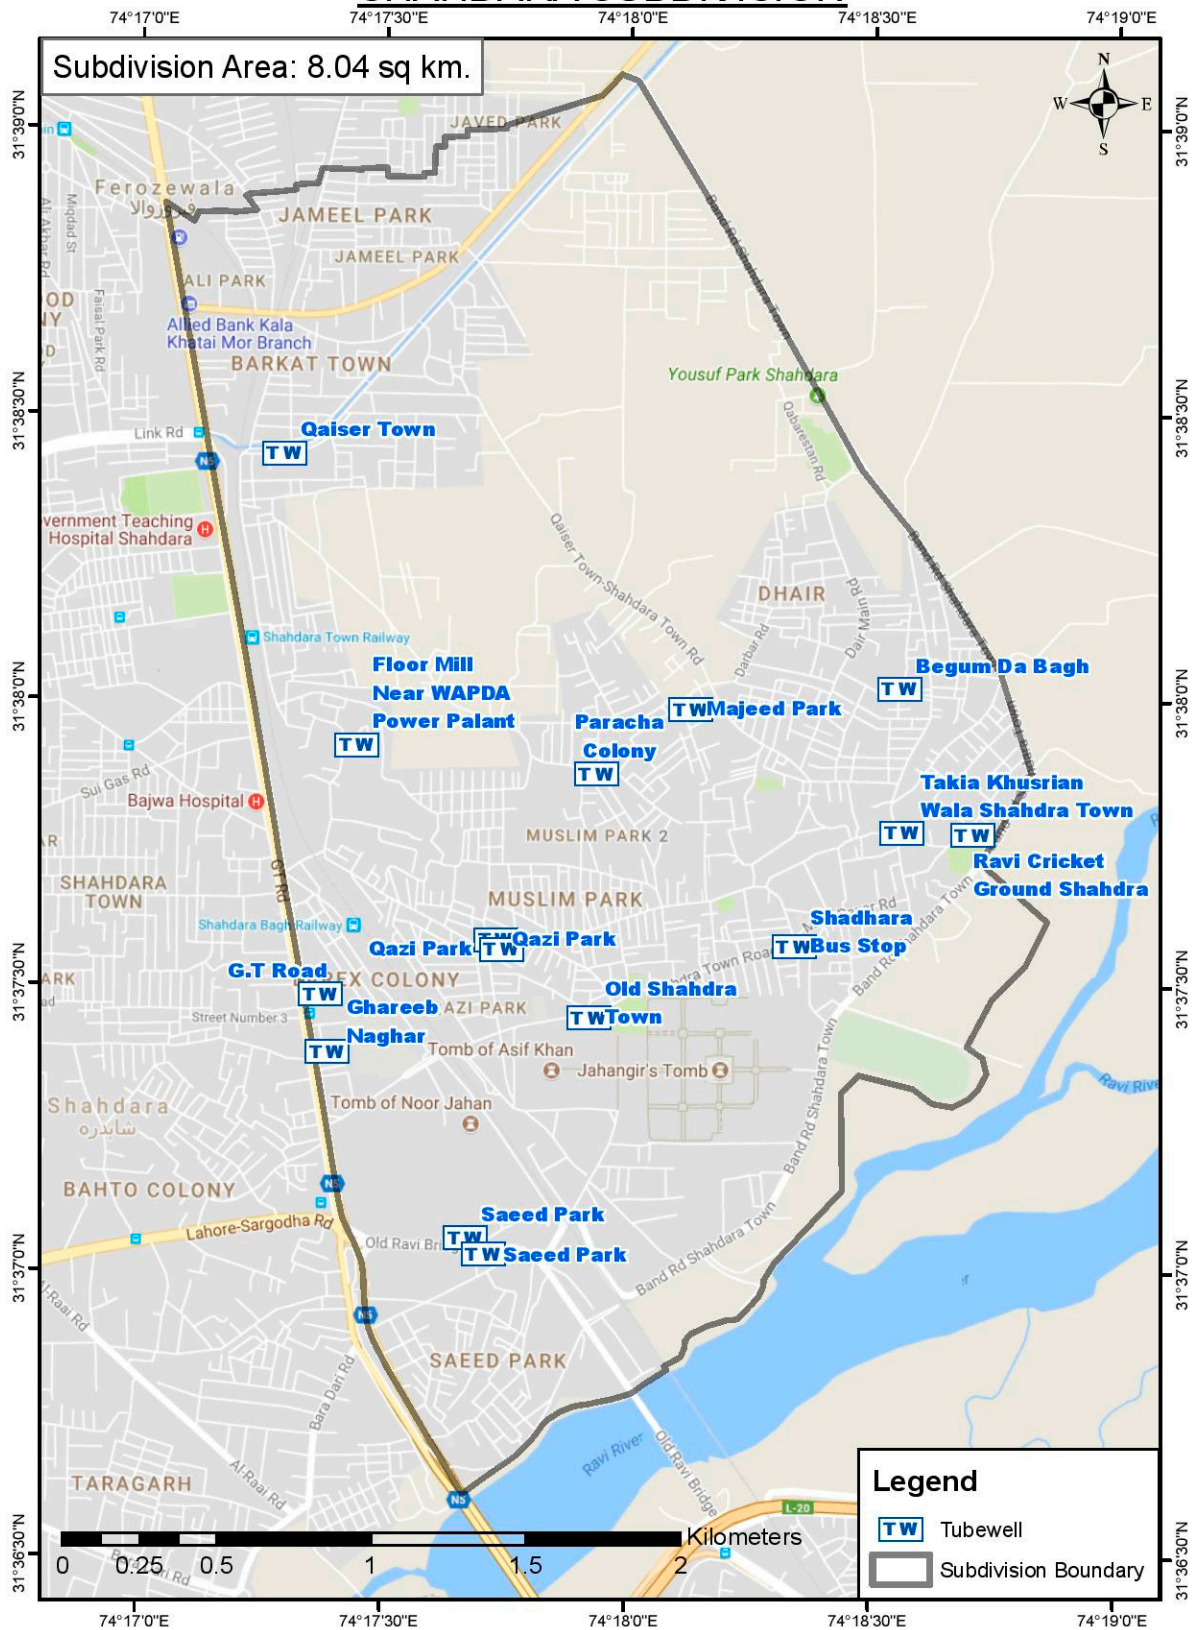

**Table-S1:** Sampling frequency of selected ground water sources

| <b>Parameter</b> | <b>Sampling<br/>frequency at<br/>single source point<br/>per year</b> | <b>Total Number of<br/>sources</b> | <b>Total number of samples for<br/>six years from<br/>(2012-2017)</b> |
|------------------|-----------------------------------------------------------------------|------------------------------------|-----------------------------------------------------------------------|
| TDS              | 4                                                                     | 50                                 | $4*6*50=1200$                                                         |
| EC               | 4                                                                     | 50                                 | $4*6*50=1200$                                                         |
| Mg               | 4                                                                     | 50                                 | $4*6*50=1200$                                                         |
| Ca               | 4                                                                     | 50                                 | $4*6*50=1200$                                                         |
| SO <sub>4</sub>  | 4                                                                     | 50                                 | $4*6*50=1200$                                                         |
| Cl               | 4                                                                     | 50                                 | $4*6*50=1200$                                                         |
| pH               | 4                                                                     | 50                                 | $4*6*50=1200$                                                         |

**Table-S2:** Results for 45 developed models of ANN for study area

| Sr<br>N<br>o | Stud<br>y<br>area | Netwo<br>rk<br>type | Training<br>algorithm | Learnin<br>g rate | Numbe<br>r of<br>neuron<br>s | All r<br>Coefficient<br>of<br>Correlatio<br>n | Coefficient of<br>determination |
|--------------|-------------------|---------------------|-----------------------|-------------------|------------------------------|-----------------------------------------------|---------------------------------|
| 1            | CITY              | FFNN                | T-BR                  | GDM               | 2                            | 0.980                                         | 0.960                           |
| 2            |                   |                     |                       |                   | 4                            | 0.980                                         | 0.960                           |
| 3            |                   |                     |                       |                   | 6                            | 0.980                                         | 0.960                           |
| 4            |                   |                     |                       |                   | 8                            | 0.979                                         | 0.958                           |
| 5            |                   |                     |                       |                   | 10                           | 0.983                                         | 0.966                           |
| 6            |                   | FFNN                | T-LM                  |                   | 2                            | 0.979                                         | 0.960                           |
| 7            |                   |                     |                       |                   | 4                            | 0.981                                         | 0.962                           |
| 8            |                   |                     |                       |                   | 6                            | 0.981                                         | 0.962                           |
| 9            |                   |                     |                       |                   | 8                            | 0.979                                         | 0.960                           |
| 10           |                   |                     |                       |                   | 10                           | 0.98                                          | 0.962                           |
| 11           |                   | FFNN                | T-SCG                 |                   | 2                            | 0.980                                         | 0.960                           |
| 12           |                   |                     |                       |                   | 4                            | 0.977                                         | 0.956                           |
| 13           |                   |                     |                       |                   | 6                            | 0.980                                         | 0.962                           |
| 14           |                   |                     |                       |                   | 8                            | -0.037                                        | 0.001                           |
| 15           |                   |                     |                       |                   | 10                           | 0.980                                         | 0.960                           |

|    |             |      |       |     |    |         |       |
|----|-------------|------|-------|-----|----|---------|-------|
| 1  | FARRUKHABAD | FFNN | T-BR  | GDM | 2  | 0.94325 | 0.889 |
| 2  |             |      |       |     | 4  | 0.9446  | 0.891 |
| 3  |             |      |       |     | 6  | 0.93863 | 0.880 |
| 4  |             |      |       |     | 8  | 0.95141 | 0.904 |
| 5  |             |      |       |     | 10 | 0.93788 | 0.878 |
| 6  |             | FFNN | T-LM  |     | 2  | 0.946   | 0.895 |
| 7  |             |      |       |     | 4  | 0.912   | 0.832 |
| 8  |             |      |       |     | 6  | 0.953   | 0.909 |
| 9  |             |      |       |     | 8  | 0.955   | 0.913 |
| 10 |             |      |       |     | 10 | 0.946   | 0.895 |
| 11 |             | FFNN | T-SCG |     | 2  | 0.946   | 0.895 |
| 12 |             |      |       |     | 4  | 0.947   | 0.897 |
| 13 |             |      |       |     | 6  | 0.951   | 0.904 |
| 14 |             |      |       |     | 8  | 0.948   | 0.899 |
| 15 |             |      |       |     | 10 | 0.942   | 0.887 |
| 1  | SHAHADRA    | FFNN | T-BR  |     | 2  | 0.861   | 0.741 |
| 2  |             |      |       |     | 4  | 0.862   | 0.743 |
| 3  |             |      |       |     | 6  | 0.865   | 0.749 |
| 4  |             |      |       |     | 8  | 0.865   | 0.748 |
| 5  |             |      |       |     | 10 | 0.864   | 0.748 |

|    |      |       |     |    |       |       |
|----|------|-------|-----|----|-------|-------|
| 6  | FFNN | T-LM  | GDM | 2  | 0.861 | 0.741 |
| 7  |      |       |     | 4  | 0.228 | 0.052 |
| 8  |      |       |     | 6  | 0.880 | 0.774 |
| 9  |      |       |     | 8  | 0.862 | 0.744 |
| 10 |      |       |     | 10 | 0.882 | 0.777 |
| 11 |      | T-SCG |     | 2  | 0.867 | 0.752 |
| 12 |      |       |     | 4  | 0.871 | 0.759 |
| 13 |      |       |     | 6  | 0.848 | 0.719 |
| 14 |      |       |     | 8  | 0.872 | 0.760 |
| 15 |      |       |     | 10 | 0.880 | 0.774 |

Table-S3: Predicted value of groundwater data from measured value of TDS.

| Study area | No of tube wells | Measured value of TDS for 2019 | Predicted value of TDS |
|------------|------------------|--------------------------------|------------------------|
| CITY       | 1                | 274mg/l                        | 274.08mg/l             |
|            | 2                | 255mg/l                        | 255.65mg/l             |
|            | 3                | 263mg/l                        | 263.41mg/l             |
|            | 4                | 245mg/l                        | 245.95mg/l             |
|            | 5                | 202mg/l                        | 204.24mg/l             |
|            | 6                | 200mg/l                        | 202.3mg/l              |
|            | 7                | 235mg/l                        | 236.25mg/l             |

|                 |    |         |            |
|-----------------|----|---------|------------|
|                 | 8  | 187mg/l | 189.69mg/l |
|                 | 9  | 198mg/l | 200.36mg/l |
|                 | 10 | 155mg/l | 158.65mg/l |
|                 | 11 | 200mg/l | 202.3mg/l  |
|                 | 12 | 213mg/l | 214.91mg/l |
|                 | 13 | 236mg/l | 237.22mg/l |
|                 | 14 | 242mg/l | 243.04mg/l |
|                 | 15 | 280mg/l | 279.9mg/l  |
|                 | 16 | 169mg/l | 172.23mg/l |
|                 | 17 | 233mg/l | 234.31mg/l |
|                 | 18 | 198mg/l | 200.36mg/l |
|                 | 19 | 201mg/l | 203.27mg/l |
|                 | 20 | 200mg/l | 202.3mg/l  |
|                 | 21 | 222mg/l | 223.64mg/l |
|                 | 22 | 241mg/l | 242.07mg/l |
|                 | 23 | 218mg/l | 219.76mg/l |
|                 | 24 | 199mg/l | 201.33mg/l |
|                 | 25 | 232mg/l | 233.34mg/l |
| FARRUK<br>HABAD | 26 | 255mg/l | 257.7mg/l  |
|                 | 27 | 277mg/l | 278.38mg/l |

|          |    |         |            |
|----------|----|---------|------------|
|          | 28 | 243mg/l | 246.42mg/l |
|          | 29 | 265mg/l | 267.1mg/l  |
|          | 30 | 300mg/l | 300mg/l    |
|          | 31 | 310mg/l | 309.4mg/l  |
|          | 32 | 285mg/l | 286mg/l    |
|          | 33 | 230mg/l | 234.2mg/l  |
|          | 34 | 170mg/l | 177.8mg/l  |
|          | 35 | 290mg/l | 291mg/l    |
|          | 36 | 225mg/l | 229.5mg/l  |
|          | 37 | 310mg/l | 309.4mg/l  |
|          | 38 | 200mg/l | 206mg/l    |
|          | 39 | 225mg/l | 239.5mg/l  |
| SHAHADRA | 40 | 280mg/l | 272.2mg/l  |
|          | 41 | 270mg/l | 264.3mg/l  |
|          | 42 | 450mg/l | 406.5mg/l  |
|          | 43 | 250mg/l | 248.5mg/l  |
|          | 44 | 255mg/l | 252.45mg/l |
|          | 45 | 237mg/l | 238.23mg/l |
|          | 46 | 229mg/l | 232mg/l    |
|          | 47 | 305mg/l | 292mg/l    |



|  |    |         |            |
|--|----|---------|------------|
|  | 48 | 290mg/l | 280mg/l    |
|  | 49 | 335mg/l | 315.65mg/l |
|  | 50 | 540mg/l | 477.6mg/l  |

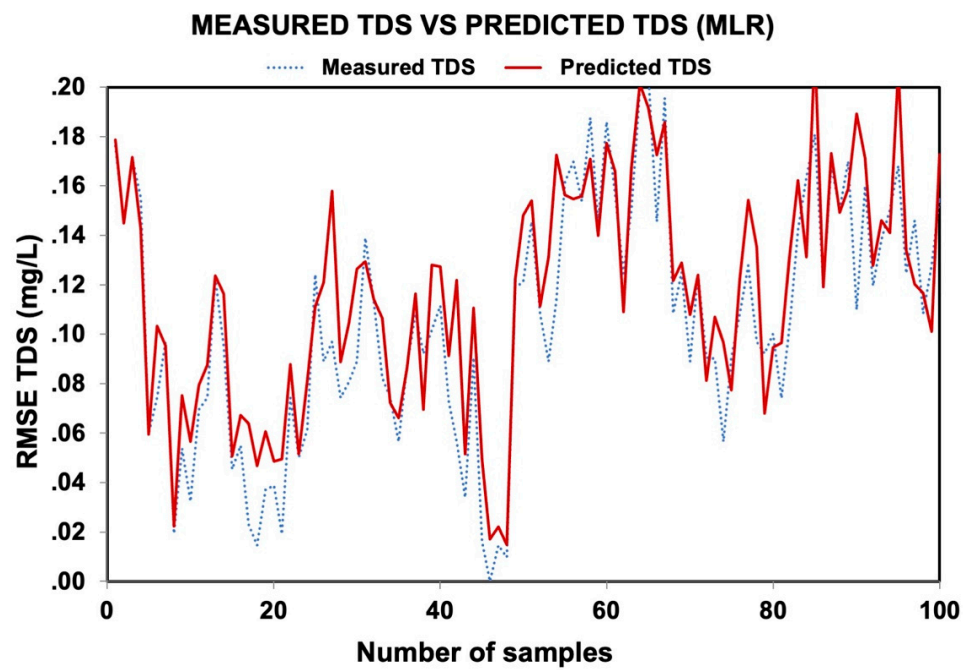

Figure S1 MLR RMSE result of city sub-division.

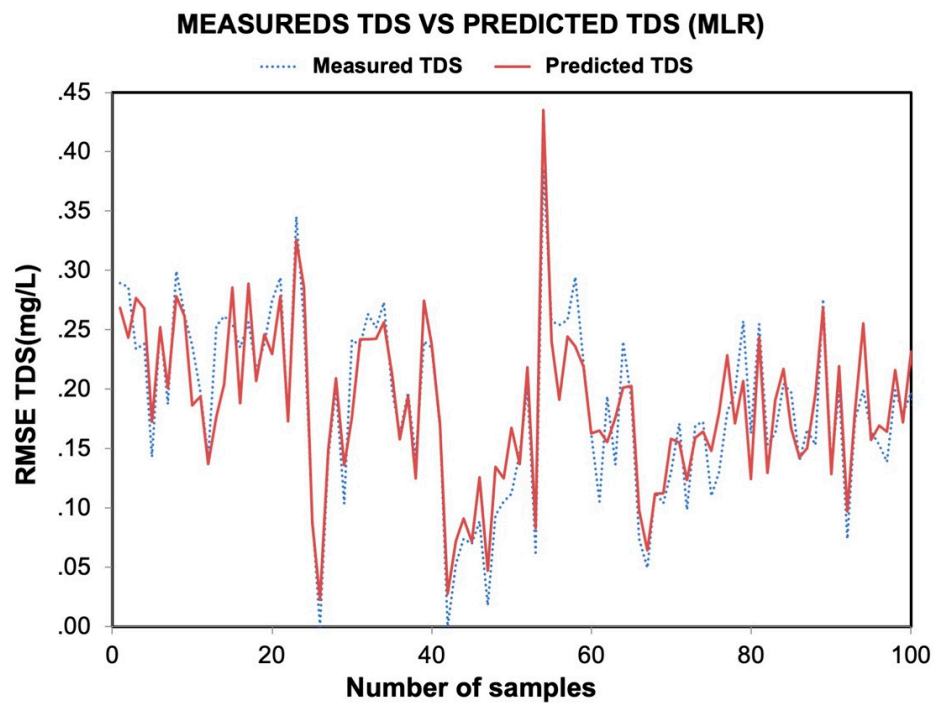

Figure S2 MLR RMSE result of Farrukhabad sub-division

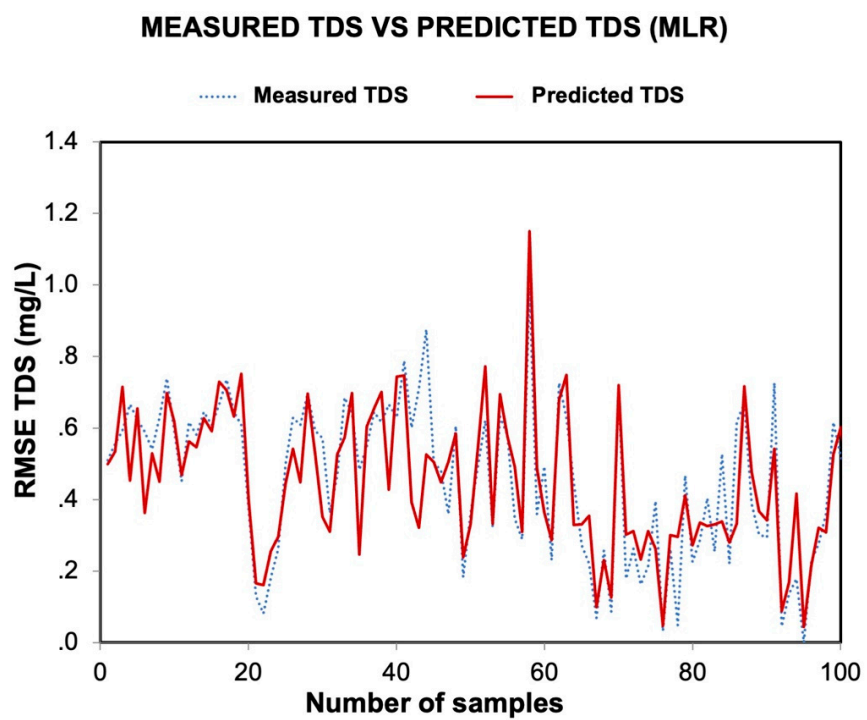

Figure S3 MLR RMSE result of Shahdara sub-division
